# Supplementary material
Source: Springer Nature journal article supplement (https://www.springermedizin.de/resource/supplementary/12885_2008_1352_MOESM1_ESM.pdf/9472212)

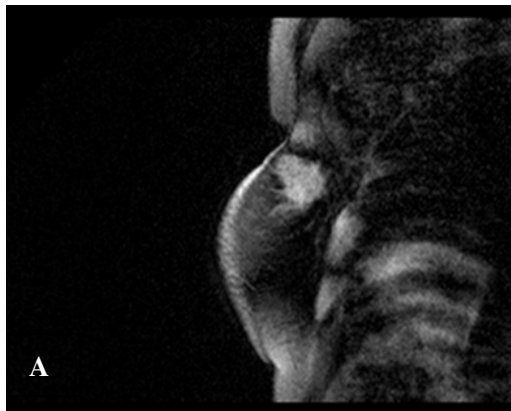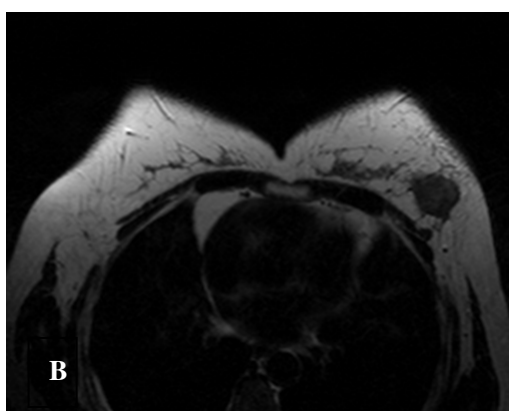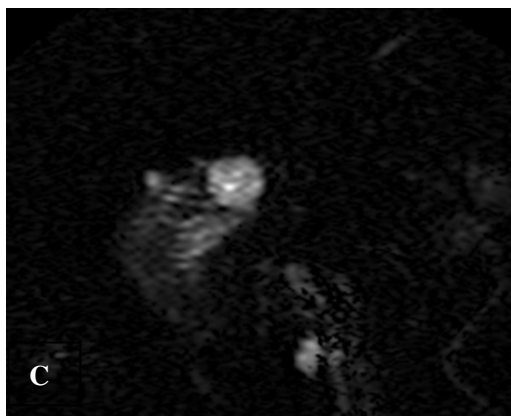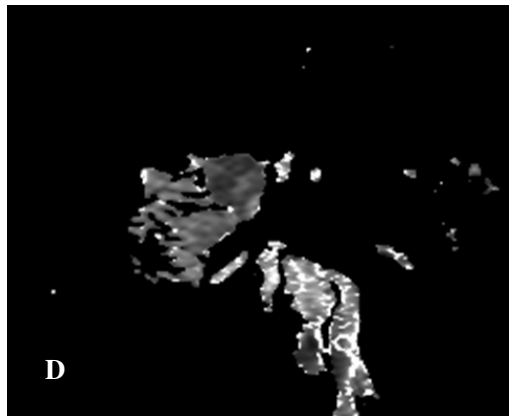

Supplement: MOESM1 [file 9472212]
